# Supplementary material for: Cancer gene mutations in congenital pulmonary airway malformation patients
Source: PubMed Central journal article supplement — ERJ Open Res. 2019 Feb 4;5(1):00196-2018. doi: 10.1183/23120541.00196-2018 (PMC6360213; doi:10.1183/23120541.00196-2018), 2019-02-04
Supplement: 00196-2018_supp_table.pdf [file 00196-2018_supp_table.pdf]

Table S5: Compound heterozygous SNVs/Indels

| Patient | Gene    | mRNA Expression in Tumor | Protein Atlas/Likelihood | Variant Type | Reference Sequence | Nucleotide Change | Protein Change | Maximum minor allele frequency (in all databases) | SIFT | PolypheS, HADY | CADD_pReid                                  | Gene Description                                            | Disease Name/Inheritance/OMIM                                                                                                      | Presence of the variant in Somatic Mutations in Cancer (COSMIC) | # Gene mutations in lung adenocarcinoma (COSMIC database) | Percentage of SNVs and indels in all lung cancer samples tested in COSMIC (n=10,000) | LINK disease: presence in genome informatics (MG)                                                                                     | Presence of the variant in the Catalogue of Somatic Mutations in Cancer (TCGA) | APC/MUC2/BAAC/SCC (Mutations in TCGA database) | Percentage of SNVs and indels in all lung cancer samples tested in TCGA for a given gene | Phenotypes described in the Incohering Disorders (IDD) project | ISP_AR   | ISP_JAE |         |
|---------|---------|--------------------------|--------------------------|--------------|--------------------|-------------------|----------------|---------------------------------------------------|------|----------------|---------------------------------------------|-------------------------------------------------------------|------------------------------------------------------------------------------------------------------------------------------------|-----------------------------------------------------------------|-----------------------------------------------------------|--------------------------------------------------------------------------------------|---------------------------------------------------------------------------------------------------------------------------------------|--------------------------------------------------------------------------------|------------------------------------------------|------------------------------------------------------------------------------------------|----------------------------------------------------------------|----------|---------|---------|
| CPAM2   | LZTSL1  | YES                      | ND                       | missense     | NM_021020          | c.1367G>A         | p.R456H        | 0.001029                                          | D    | D              | 34.0                                        | leucine zipper tumor suppressor 1                           | Esophageal squamous cell carcinoma/AD/133239                                                                                       | Reported in 1 lung adenocarcinoma patient COSM335951            | 26/0/0/2                                                  | 1.14                                                                                 | ND                                                                                                                                    | ND                                                                             | 70/6/15/16                                     | 0.51                                                                                     | ND                                                             | 0.08093  | 0.03918 |         |
|         |         | NO/YES                   | NO/YES                   | missense     | NM_001142769       | c.4537A>G         | p.K1513E       | 0.000580                                          | D    | B              | 19.9                                        | protocadherin related 15                                    | Deafness/AR/609533; Usher syndrome1D/F digenic/AD/601067; Usher syndrome1F/AR/602083                                               | Reported in 1 colon adenocarcinoma patient COSM2147499          | 203/0/0/52                                                | 9.43                                                                                 | ND                                                                                                                                    | ND                                                                             | 371/50/107/158                                 | 4.30                                                                                     | ND                                                             | 0.10415  | 0.82105 |         |
| CPAM4   | VWA8    | YES                      | ND                       | missense     | NM_015058          | c.4721G>C         | p.G1574A       | 0.007042                                          | D    | P              | 29.1                                        | von Willebrand factor                                       | ND                                                                                                                                 | ND                                                              | 0/0/0/0                                                   | 74(KIAA056)                                                                          | ND                                                                                                                                    | ND                                                                             | 153/15/11/22                                   | 0.45                                                                                     | ND                                                             | 0.07414  | 0.01582 |         |
|         |         | ND                       | ND                       | missense     | NM_001272046       | c.2445G>A         | p.D82N         | 0.001968                                          | D    | D              | 32.0                                        | A domain containing 8                                       | ND                                                                                                                                 | ND                                                              | 19/0/0/1                                                  | 0.72                                                                                 | ND                                                                                                                                    | ND                                                                             | 51/5/5/11                                      | 0.18                                                                                     | ND                                                             | 0.01892  | 0.01702 |         |
| CPAM6   | DYNC2H1 | YES                      | ND                       | missense     | NM_001377          | c.5177G>A         | p.R1726Q       | 0.005102                                          | D    | D              | 34.0                                        | dynein cytoplasmic 2 heavy chain 1                          | Short-rib thoracic dysplasia 3 with or without polydactyly/AR-AD/613091; Short-rib-polydactyly syndrome-III/615087 and -III/263510 | ND                                                              | 25/0/0/6                                                  | 0.93                                                                                 | abnormal lung lobe morphology, aorta pulmonary collateral arteries, tracheoesophageal fistula, abnormal respiratory system morphology | ND                                                                             | 246/34/33/52                                   | 1.17                                                                                     | SHORT RIB                                                      | 0.02974  | 0.04391 |         |
|         |         | ND                       | ND                       | missense     | NM_001377          | c.7576A>G         | p.I2526V       | 0.008637                                          | T    | B              | 5.1                                         | connector enhancer of kinase suppressor of Ras 1 (Approved) | ND                                                                                                                                 | ND                                                              | 15/0/0/1                                                  | 0.71                                                                                 | ND                                                                                                                                    | ND                                                                             | 64/13/12/14                                    | 0.37                                                                                     | AL RETARD                                                      | 0.01051  | 0.00654 |         |
| CPAM11  | CNKSR1  | YES                      | ND                       | missense     | NM_001297647       | c.1058C>G         | p.P353R        | N                                                 | D    | P              | 10.3                                        | connector enhancer of kinase suppressor of Ras 1 (Approved) | ND                                                                                                                                 | ND                                                              | 15/0/0/1                                                  | 0.71                                                                                 | ND                                                                                                                                    | ND                                                                             | 64/13/12/14                                    | 0.37                                                                                     | AL RETARD                                                      | 0.01051  | 0.00654 |         |
|         |         | NO/NO                    | missense                 | NM_001040105 | c.7733G>T          | p.S2578I          | 0.000231       | D                                                 | D    | 0.0            | mucin 17, cell surface associated, probably | ND                                                          | ND                                                                                                                                 | 187/0/0/27                                                      | 13.19                                                     | ND                                                                                   | ND                                                                                                                                    | 336/49/104/168                                                                 | 4.07                                           | ND                                                                                       | 0.03646                                                        | 0.04953  |         |         |
| CPAM14  | HELR2   | YES                      | ND                       | missense     | NM_001037335       | c.4871C>T         | p.L1624M       | 0.000274                                          | D    | D              | 24.4                                        | helicase with zinc finger 2                                 | ND                                                                                                                                 | ND                                                              | 0/0/0/0                                                   | 95(PRIC28)                                                                           | ND                                                                                                                                    | ND                                                                             | 127/22/15/43                                   | 0.80                                                                                     | ND                                                             | 0.10566  | 0.07884 |         |
|         |         | ND                       | ND                       | missense     | NM_015491          | c.2350G>A         | p.V784M        | 0.000231                                          | T    | B              | 14.4                                        | FN1 interacting serine 23.5 and arginine rich               | ND                                                                                                                                 | ND                                                              | 28/0/0/2                                                  | 0.81                                                                                 | ND                                                                                                                                    | ND                                                                             | 6/0/6/13                                       | 0.39                                                                                     | ND                                                             | 0.03104  | 0.01262 |         |
| CPAM15  | PNSR    | YES                      | ND                       | missense     | NM_015491          | c.1360G>C         | p.E454Q        | 0.001006                                          | D    | P              | 23.5                                        | zinc finger protein 804B                                    | ND                                                                                                                                 | ND                                                              | 89/0/0/15                                                 | 7.15                                                                                 | ND                                                                                                                                    | ND                                                                             | 195/25/49/123                                  | 2.59                                                                                     | ND                                                             | 0.04171  | 0.02487 |         |
|         |         | ND                       | ND                       | missense     | NM_181644          | c.592T>G          | p.L198V        | 0.005114                                          | T    | D              | 0.6                                         | zinc finger protein 804B                                    | ND                                                                                                                                 | ND                                                              | 89/0/0/15                                                 | 7.15                                                                                 | ND                                                                                                                                    | ND                                                                             | 195/25/49/123                                  | 2.59                                                                                     | ND                                                             | 0.04171  | 0.02487 |         |
| CPAM18  | ZNF804B | YES                      | ND                       | missense     | NM_181644          | c.680T>G          | p.V227G        | 0.000349                                          | D    | P              | 23.7                                        | zinc finger protein 804B                                    | ND                                                                                                                                 | ND                                                              | 89/0/0/15                                                 | 7.15                                                                                 | ND                                                                                                                                    | ND                                                                             | 195/25/49/123                                  | 2.59                                                                                     | ND                                                             | 0.04171  | 0.02487 |         |
|         |         | ND                       | ND                       | missense     | NM_015057          | c.939C>G          | p.S3110C       | 0.000926                                          | D    | D              | 25.3                                        | MYC binding protein 2, E3 ubiquitin protein                 | ND                                                                                                                                 | ND                                                              | 69/0/0/7                                                  | 3.68                                                                                 | respiratory distress of                                                                                                               | ND                                                                             | 231/44/36/76                                   | 1.48                                                                                     | ND                                                             | 0.03268  | 0.10894 |         |
| CPAM19  | MYCBP2  | YES                      | ND                       | missense     | NM_015057          | c.6544A>G         | p.I2182V       | 0.001279                                          | T    | B              | 4.8                                         | E3 ubiquitin protein                                        | ND                                                                                                                                 | ND                                                              | 69/0/0/7                                                  | 3.68                                                                                 | respiratory distress of                                                                                                               | ND                                                                             | 231/44/36/76                                   | 1.48                                                                                     | ND                                                             | 0.03268  | 0.10894 |         |
|         |         | ND                       | ND                       | missense     | NM_174916          | c.3934G>C         | p.E1312Q       | N                                                 | D    | D              | 27.1                                        | ubiquitin protein ligase E3 component n-recognin 1          | Johanson-Bizzard syndrome/AR/243800                                                                                                | Somatic in 5 colon adenocarcinoma patients COSM4054765          | 33/0/0/2                                                  | 1.69                                                                                 | ND                                                                                                                                    | ND                                                                             | 101/15/13/19                                   | 0.47                                                                                     | JOHNSC                                                         | 0.70122  | 0.66117 |         |
| CPAM20  | MKI67   | YES                      | ND                       | missense     | NM_002417          | c.5360C>T         | p.P1787L       | 0.001006                                          | T    | B              | 11.7                                        | marker of proliferation                                     | ND                                                                                                                                 | ND                                                              | 127/0/0/8                                                 | 4.27                                                                                 | ND                                                                                                                                    | ND                                                                             | 217/43/33/85                                   | 1.50                                                                                     | ND                                                             | 0.04496  | 0.07252 |         |
|         |         | ND                       | ND                       | missense     | NM_182961          | c.890G>T          | p.G297V        | N                                                 | D    | D              | 23.5                                        | Ki-67                                                       | Emery-Dreifuss muscular dystrophy 4/AD/612998; Spinocerebellar ataxia/AR/610743                                                    | ND                                                              | ND                                                        | 424/0/0/72                                                                           | 13.45                                                                                                                                 | atelectasis, small lung                                                        | ND                                             | 525/9/176/282                                                                            | 4.79                                                           | SPINOCEF | 0.04877 | 0.76574 |
| CCAM22  | SYNE1   | YES                      | ND                       | missense     | NM_182961          | c.17053A>G        | p.K568E        | 0.001166                                          | D    | P              | 29.0                                        | spectrin repeat containing nuclear envelope protein 1       | ND                                                                                                                                 | ND                                                              | 424/0/0/72                                                | 13.45                                                                                | atelectasis, small lung                                                                                                               | ND                                                                             | 525/9/176/282                                  | 4.79                                                                                     | SPINOCEF                                                       | 0.04877  | 0.76574 |         |
|         |         | ND                       | ND                       | missense     | NM_001098623       | c.8557A>G         | p.T2853A       | 0.007166                                          | D    | B              | 10.5                                        | envelope protein 1                                          | ND                                                                                                                                 | ND                                                              | 264/2/0/27                                                | 9.18                                                                                 | ND                                                                                                                                    | ND                                                                             | 472/76/87/126                                  | 3.08                                                                                     | ND                                                             | 0.10292  | 0.07891 |         |
| CPAM23  | OBSCN   | YES                      | ND                       | missense     | NM_001098623       | c.3322T>A         | p.Y1108N       | 0.003018                                          | D    | D              | 22.6                                        | obscurin, cytoskeletal                                      | ND                                                                                                                                 | ND                                                              | 264/2/0/27                                                | 9.18                                                                                 | ND                                                                                                                                    | ND                                                                             | 472/76/87/126                                  | 3.08                                                                                     | ND                                                             | 0.10292  | 0.07891 |         |
|         |         | ND                       | ND                       | missense     | NM_000787          | c.5867C>G         | p.T1956S       | 0.001006                                          | T    | D              | 23.0                                        | calmodulin and titin                                        | ND                                                                                                                                 | ND                                                              | 264/2/0/27                                                | 9.18                                                                                 | ND                                                                                                                                    | ND                                                                             | 472/76/87/126                                  | 3.08                                                                                     | ND                                                             | 0.10292  | 0.07891 |         |
| CPAM23  | DBH     | YES                      | ND                       | missense     | NM_000787          | c.1088G>A         | p.G363E        | 0.001740                                          | D    | D              | 26.3                                        | dopamine beta-hydroxylase                                   | Dopamine beta-hydroxylase deficiency/223360                                                                                        | Somatic in 1 malignant melanoma patient COSM4398533             | 29/0/0/4                                                  | 1.02                                                                                 | ND                                                                                                                                    | ND                                                                             | 55/14/11/11                                    | 0.29                                                                                     | ND                                                             | 0.80889  | 0.76638 |         |
|         |         | ND                       | ND                       | missense     | NM_003330          | c.1498C>G         | p.L500V        | 0.000699                                          | D    | D              | 25.9                                        | thioredoxin reductase                                       | ND                                                                                                                                 | ND                                                              | 9/0/0/5                                                   | 0.59                                                                                 | ND                                                                                                                                    | ND                                                                             | 49/7/4/14                                      | 0.21                                                                                     | ND                                                             | 0.09237  | 0.06038 |         |
| CPAM24  | TXNRD1  | YES                      | ND                       | missense     | NM_003330          | c.95T>C           | p.I32T         | 0.001275                                          | D    | P              | 22.7                                        | thioredoxin reductase                                       | ND                                                                                                                                 | ND                                                              | 9/0/0/5                                                   | 0.59                                                                                 | ND                                                                                                                                    | ND                                                                             | 49/7/4/14                                      | 0.21                                                                                     | ND                                                             | 0.09237  | 0.06038 |         |
|         |         | ND                       | ND                       | missense     | NM_001287212       | c.1115A>G         | p.D372G        | 0.001109                                          | D    | B              | 25.2                                        | I                                                           | ND                                                                                                                                 | ND                                                              | 51/0/0/14                                                 | 2.46                                                                                 | ND                                                                                                                                    | ND                                                                             | 91/15/16/17                                    | 0.51                                                                                     | ND                                                             | 0.03334  | 0.05653 |         |
| CPAM24  | KIF17   | YES                      | ND                       | splicing     | NM_001287212       | c.2492+1G>A       | Gdonor         | 0.000347                                          | NA   | NA             | 23.5                                        | kinesin family member 17, Cytoskeleton                      | ND                                                                                                                                 | ND                                                              | 51/0/0/14                                                 | 2.46                                                                                 | ND                                                                                                                                    | ND                                                                             | 91/15/16/17                                    | 0.51                                                                                     | ND                                                             | 0.03334  | 0.05653 |         |
|         |         | ND                       | ND                       | missense     | NM_014935          | c.913G>A          | p.E305K        | 0.005679                                          | T    | D              | 25.0                                        | I7, Cytoskeleton                                            | ND                                                                                                                                 | ND                                                              | 51/0/0/14                                                 | 2.46                                                                                 | ND                                                                                                                                    | ND                                                                             | 91/15/16/17                                    | 0.51                                                                                     | ND                                                             | 0.03334  | 0.05653 |         |
| CPAM28  | PLEKHA6 | YES                      | ND                       | missense     | NM_014935          | c.3019C>T         | p.R1007C       | 0.000064                                          | D    | D              | 34.0                                        | pleckstrin                                                  | ND                                                                                                                                 | ND                                                              | 24/0/0/5                                                  | 1.82                                                                                 | ND                                                                                                                                    | ND                                                                             | 122/24/13/25                                   | 0.45                                                                                     | ND                                                             | 0.06985  | 0.0256  |         |
|         |         | ND                       | ND                       | missense     | NM_032119          | c.2606A>C         | p.H869P        | 0.002431                                          | T    | D              | 24.0                                        | transmembrane 2C/AR or digenic/605472                       | Usher syndrome, type 2C/AR or digenic/605472                                                                                       | ND                                                              | ND                                                        | 0/0/0/0                                                                              | .86(GPR98)                                                                                                                            | ND                                                                             | ND                                             | 334/50/50/137                                                                            | 2.55                                                           | ND       | ND      | ND      |
| CPAM30  | ADGRV1  | YES                      | ND                       | missense     | NM_032119          | c.9701C>T         | p.A3234V       | 0.003020                                          | T    | B              | 22.9                                        | transmembrane 2C/AR or digenic/605472                       | Usher syndrome, type 2C/AR or digenic/605472                                                                                       | ND                                                              | ND                                                        | 0/0/0/0                                                                              | .86(GPR98)                                                                                                                            | ND                                                                             | ND                                             | 334/50/50/137                                                                            | 2.55                                                           | ND       | ND      | ND      |
|         |         | ND                       | ND                       | missense     | NM_173462          | c.10448G>T        | p.D3550Y       | 0.001006                                          | D    | P              | 13.5                                        | receptor domain                                             | ND                                                                                                                                 | ND                                                              | 49/0/0/6                                                  | 0.72                                                                                 | ND                                                                                                                                    | ND                                                                             | 84/20/8/21                                     | 0.41                                                                                     | ND                                                             | 0.01895  | 0.00778 |         |
| CPAM31  | PAPLN   | YES                      | ND                       | missense     | NM_173462          | c.973C>G          | p.R326G        | 0.001279                                          | T    | P              | 22.8                                        | papilin, proteoglycan                                       | ND                                                                                                                                 | ND                                                              | 49/0/0/6                                                  | 0.72                                                                                 | ND                                                                                                                                    | ND                                                                             | 84/20/8/21                                     | 0.41                                                                                     | ND                                                             | 0.01895  | 0.00778 |         |
|         |         | ND                       | ND                       | missense     | NM_173462          | c.2259C>A         | p.N753K        | 0.001610                                          | T    | D              | 26.1                                        | like sulfated                                               | ND                                                                                                                                 | ND                                                              | 49/0/0/6                                                  | 0.72                                                                                 | ND                                                                                                                                    | ND                                                                             | 84/20/8/21                                     | 0.41                                                                                     | ND                                                             | 0.01895  | 0.00778 |         |

D: damaging; P: potentially damaging; T: tolerated; B: benign; ND: not described; NA: not applicable; AR: autosomal recessive; AD: autosomal dominant; ADC: Adenocarcinoma; MUC: Mucinous carcinoma; BAAC: Bronchioloalveolar adenocarcinoma; SCC: squamous cell/MUC: Cystic, Mucinous and Serous Neoplasms in TCGA; SCC\*: Squamous Cell Neoplasms in TCGA.
